# Supplementary material for: Phylogenomic relationship and evolutionary insights of sweet potato viruses from the western highlands of Kenya
Source: PubMed Central journal article supplement (PMC6054865; doi:10.7717/peerj.5254), 2018-07-19

SVDQuartets bootstrap consensus

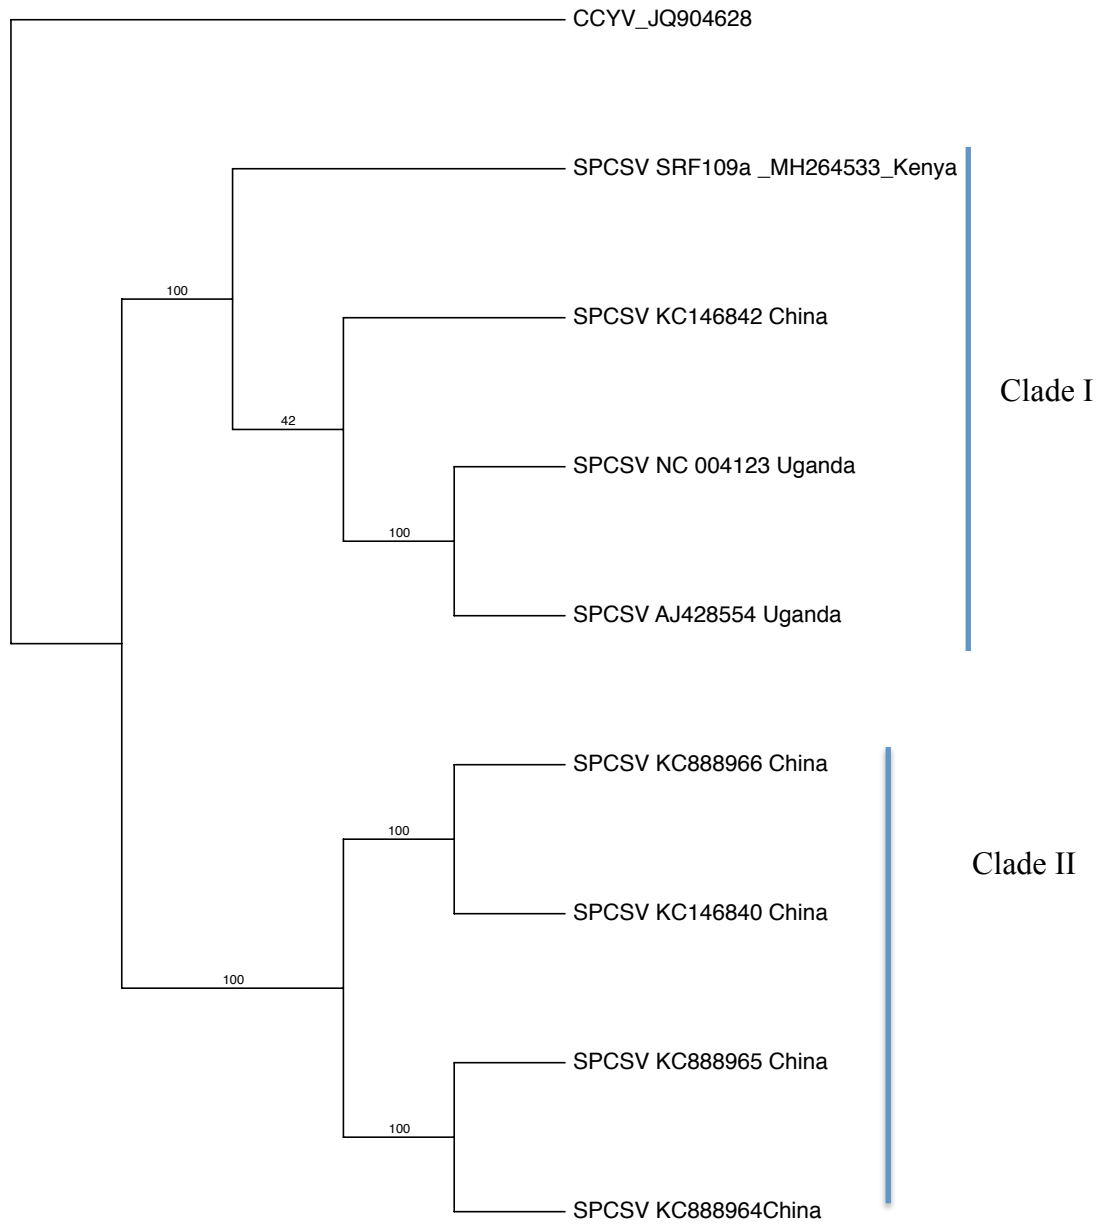

Supplement: peerj-06-5254-s005.pdf [file peerj-06-5254-s005.pdf]
